# Supplementary material for: Should We Consider Them as a Threat? Antimicrobial Resistance, Virulence Potential and Genetic Diversity of Campylobacter spp. Isolated from Varsovian Dogs
Source: MDPI journal article supplement (doi:10.3390/antibiotics11070964), 2022-07-18
Supplement: s1 [file s1]

Table S1. The summary of information on *Campylobacter*-positive dogs.

| Dog ID | Origin  | Sex | Age       | Parasites | <i>Campylobacter</i><br>strain<br>designation | <i>Campylobacter</i><br>species      |
|--------|---------|-----|-----------|-----------|-----------------------------------------------|--------------------------------------|
| 03     | Shelter | M   | 2 years   | +         | 3                                             | <i>C. lari</i>                       |
| 08     | Shelter | M   | 5 years   | +         | 8                                             | <i>C. jejuni</i>                     |
| 10     | Shelter | F   | 3 years   | +         | 10sz<br>10b                                   | <i>C. lari</i><br><i>C. lari</i>     |
| 13     | Shelter | F   | 2 years   | +         | 13d<br>13m                                    | <i>C. jejuni</i><br><i>C. jejuni</i> |
| 24     | Private | F   | 1 year    | -         | 24                                            | <i>C. lari</i>                       |
| 26     | Private | M   | 12 years  | -         | 26b                                           | <i>C. jejuni</i>                     |
| 28     | Shelter | M   | 12 years  | -         | 28                                            | <i>C. upsaliensis</i>                |
| 30     | Shelter | M   | 5 months  | -         | 30                                            | <i>C. lari</i>                       |
| 31     | Shelter | M   | 5 months  | -         | 31                                            | <i>C. lari</i>                       |
| 33     | Shelter | F   | 2,5 years | +         | 33                                            | <i>C. jejuni</i>                     |
| 34     | Shelter | M   | 1,5 years | +         | 34                                            | <i>C. jejuni</i>                     |
| 35     | Shelter | M   | 8 months  | -         | 35                                            | <i>C. upsaliensis</i>                |
| 37     | Shelter | F   | 1,5 years | +         | 37                                            | <i>C. upsaliensis</i>                |
| 83     | Shelter | M   | 1 year    | +         | 83                                            | <i>C. lari</i>                       |
| 85     | Private | M   | 8 months  | +         | 85<br>85sz                                    | <i>C. jejuni</i><br><i>C. jejuni</i> |
| 89     | Shelter | F   | 1 year    | +         | 89                                            | <i>C. lari</i>                       |
| 102    | Private | F   | 10 years  | -         | 102                                           | <i>C. jejuni</i>                     |
| 104    | Shelter | M   | 7 years   | +         | 104<br>104 $\alpha$                           | <i>C. jejuni</i><br><i>C. jejuni</i> |
| 112    | Shelter | M   | 8 years   | +         | 112                                           | <i>C. jejuni</i>                     |
| 132    | Shelter | F   | 5 years   | -         | 132                                           | <i>C. lari</i>                       |
| 157    | Shelter | F   | 2 months  | +         | 157                                           | <i>C. jejuni</i>                     |
| 179    | Private | M   | 10 months | -         | 179                                           | <i>C. jejuni</i>                     |
| 183    | Private | F   | 1 year    | +         | 183                                           | <i>C. jejuni</i>                     |
| 209    | Private | M   | 2 years   | +         | 209                                           | <i>C. jejuni</i>                     |
| 267    | Private | M   | 5 months  | +         | 267                                           | <i>C. jejuni</i>                     |
| 292    | Private | F   | 10 years  | -         | 292a<br>292b                                  | <i>C. jejuni</i><br><i>C. jejuni</i> |
