# Supplementary material for: Should We Consider Them as a Threat? Antimicrobial Resistance, Virulence Potential and Genetic Diversity of Campylobacter spp. Isolated from Varsovian Dogs
Source: MDPI journal article supplement (doi:10.3390/antibiotics11070964), 2022-07-18
Supplement: s1 [file s1]

Table S2. The summary of information on the presence of the selected virulence factor genes among *Campylobacter* isolates.

| Virulence factor    | Gene        | Occurrence [%] | <i>Campylobacter</i> species                              |
|---------------------|-------------|----------------|-----------------------------------------------------------|
| Motility            | <i>flaA</i> | 100.0          | <i>C. jejuni</i> , <i>C. lari</i> , <i>C. upsaliensis</i> |
|                     | <i>flaB</i> | 100.0          | <i>C. jejuni</i> , <i>C. lari</i> , <i>C. upsaliensis</i> |
| CDT subunits        | <i>cdtA</i> | 100.0          | <i>C. jejuni</i> , <i>C. lari</i> , <i>C. upsaliensis</i> |
|                     | <i>cdtB</i> | 100.0          | <i>C. jejuni</i> , <i>C. lari</i> , <i>C. upsaliensis</i> |
|                     | <i>cdtC</i> | 100.0          | <i>C. jejuni</i> , <i>C. lari</i> , <i>C. upsaliensis</i> |
| Adhesion & Invasion | <i>ciaB</i> | 100.0          | <i>C. jejuni</i> , <i>C. lari</i> , <i>C. upsaliensis</i> |
|                     | <i>cadF</i> | 90.0           | <i>C. jejuni</i> , <i>C. lari</i>                         |
|                     | <i>pldA</i> | 100.0          | <i>C. jejuni</i> , <i>C. lari</i> , <i>C. upsaliensis</i> |
|                     | <i>flpA</i> | 100.0          | <i>C. jejuni</i> , <i>C. lari</i> , <i>C. upsaliensis</i> |
